# Supplementary material for: Novel magnetic Fe3O4@rGO@ZnO onion-like microspheres decorated with Ag nanoparticles for the efficient photocatalytic oxidation of metformin: toxicity evaluation and insights into the mechanisms
Source: Royal Society of Chemistry journal article supplement (doi:10.1039/c9cy01381d), 2019-01-01
Supplement: c9cy01381d1.pdf [file c9cy01381d1.pdf]

A novel magnetic Fe<sub>3</sub>O<sub>4</sub>@rGO@ZnO onion-like microsphere decorated  
with Ag nanoparticles for efficient photocatalytic oxidation of  
metformin; in-vitro toxicity evaluation of wastewater and PCO-treated  
water and mechanism insight

Amir Hossein Cheshme Khavar<sup>1</sup>, Gholamreza Moussavi<sup>1,\*</sup>, Alireza Mahjoub<sup>2</sup>, Kamyar Yaghmaeian<sup>3</sup>, Varsha Srivastava<sup>4</sup>, Mika Sillanpää<sup>4</sup>, Mohammad Satari<sup>5</sup>

<sup>1</sup>Department of Environmental Health Engineering, Faculty of Medical Sciences, Tarbiat Modares University, Tehran, Iran

<sup>2</sup>Department of Chemistry, Faculty of Basic Sciences, Tarbiat Modares University, Tehran, Iran

<sup>3</sup>Department of Environmental Health Engineering, School of Public Health, Tehran University of Medical Sciences, Tehran, Iran

<sup>4</sup>Department of Green Chemistry, School of Engineering Science, Lappeenranta University of Technology, Sammonkatu 12, FI-50130 Mikkeli, Finland

<sup>5</sup>Department of Biology, Faculty of Sciences, Malayer University, Malayer, Iran

Correspondence to Gholamreza Moussavi, E-mail: [moussavi@modares.ac.ir](mailto:moussavi@modares.ac.ir)

Tel: +98 21 82883827, Fax: +98 21 82884580

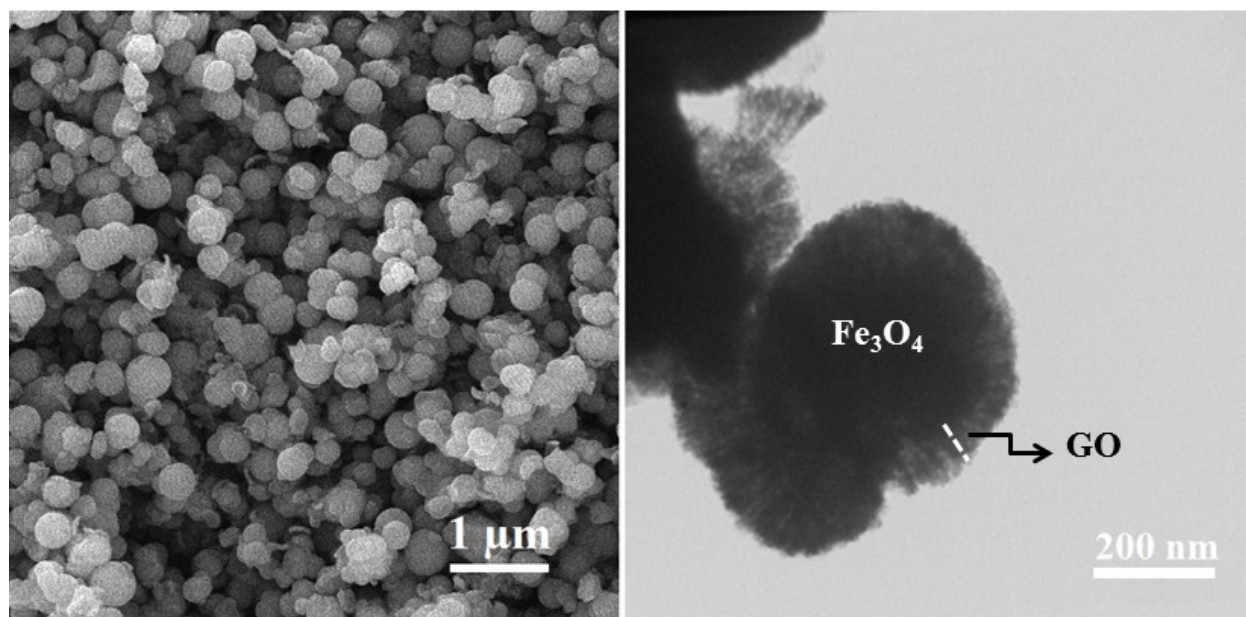

Figure S1. SEM and TEM images of  $\text{Fe}_3\text{O}_4/\text{GO}$  sample.
